# Supplementary material
Source: publisher figshare collection journal article supplement (https://gsapubs.figshare.com/ndownloader/files/40801316)
Supplement: Supplementary file 1 [file 40801316]

Percival, L.M.E., et al., 2023, **Valanginian climate cooling and environmental change driven by Paraná-Etendeka basalt erosion**: *Geology*, <https://doi.org/10.1130/G51202.1>

## Supplemental Material

**Appendices S1–S2**

**Figure S1**

**Tables S1–S2**

## Appendix S1: Supplementary Text

### S1-1: DSDP Sites 534 and 603: Site description and age model construction

Two proto-Atlantic sites are studied here, DSDP Site 603, Hole B (lower continental rise off Cape Hatteras: 35° 29.66' N; 70° 01.70' W) and DSDP Site 534, Hole A (Blake Bahama Basin: 28° 20.6' N, 75° 22.9' W). Both archives record low-latitude, warm (> 32 °C; Littler *et al.*, 2011), open marine settings on the continental slope or abyssal plain east of North America. The sedimentary rocks themselves primarily consist of pelagic bioturbated chalks interbedded with more-organic rich laminated marls and sandstones–mudstones, likely including sporadic distal turbidite layers (Sheridan *et al.*, 1983b; van Hinte *et al.*, 1987). Robust calcareous nannofossil biostratigraphy exists for both sites (Covington and Wise, 1987; Bergen, 1994; Bornemann and Mutterlose, 2008), enabling stratigraphic correlation with other Berriasian–Hauterivian archives. Magnetic polarity timescales have also been generated for the two records (Ogg *et al.*, 1987); however, both sites also feature large uncertainties in the lower Valanginian chron boundaries between M14 and M11A.

Age models for the two sites were previously constructed by Littler *et al.* (2011), based on the published magnetostratigraphy for the two records and the determined ages of Early Cretaceous chron boundaries (Ogg, 1987; Gradstein *et al.*, 2004). However, the lack of a precise record of chrons M14–M11A at either Site 534 or Site 603 necessitated a simplified age model assuming constant sedimentation rates for ~30–40 m of strata between M15n and M11r.2r, which included the crucial strata that document the run-up to and onset of the Weissert Event. In recent years, the Valanginian–Hauterivian geological timescale has been increasingly refined via cyclostratigraphic analyses of stratigraphic sites (chiefly from the Vocontian Basin; e.g., Charbonnier *et al.*, 2013; Martinez *et al.*, 2013, 2015, 2023), anchored against radioisotopic dating of bentonite layers (e.g., Aguirre-Urreta *et al.*, 2008, 2015, 2017). These new anchors enable refinement of the age models for Valanginian strata at Sites 534 and 603.

Aside from the chron boundary data, stratigraphic constraints for Site 534 and Site 603 are based on calcareous nannofossil biozone data, together with carbonate carbon isotope ( $\delta^{13}\text{C}_{\text{carb}}$ ) information representative of global trends (Covington and Wise, 1987; Bergen, 1994; Bornemann and Mutterlose, 2008). Durations of 2.84 Myr, 2.01 Myr, and 1.91 Myr have been proposed for the Valanginian calcareous nannofossil zones NK3A, NK3B, and NC4A, respectively, following cyclostratigraphic analyses of four Vocontian Basin records (Martinez *et al.*, 2023). Alternatively, slightly different lengths of zones NK3A and NK3B (of 1.46 Myr and 1.9 Myr) have been suggested, based on a floating astrochronological timescale for a separate Vocontian Basin record (Charbonnier *et al.*, 2013). Importantly, the Martinez astrochronological timescale has subsequently been anchored to U–Pb radioisotopically determined ages of bentonite layers just above the lower–upper Hauterivian boundary at Agua de la Mula (Neuquén Basin, Argentina). The combined cyclostratigraphic and radioisotopic data give precise dates for the Berriasian–Valanginian boundary ( $137.06 \pm 0.19$  Ma), the Valanginian–Hauterivian boundary ( $131.25 \pm 0.19$  Ma), and the calcareous nannofossil boundaries, at least in the Vocontian Basin (Martinez *et al.*, 2013, 2015, 2023). Here, it is assumed that the dates and durations for Valanginian calcareous nannofossil biozones determined for stratigraphic archives from the Vocontian Basin (from Martinez *et al.*, 2023) can also be applied to the relatively nearby proto-Atlantic region.

Unfortunately, a similarly precise cyclostratigraphic age model based on calcareous nannofossil biostratigraphy does not currently exist for the Berriasian Stage, and the ages and durations of the NK2A and NK2B calcareous nannofossil zones are unknown. Consequently, for strata below the base of the NK3A Zone, magnetic chron boundaries are retained as the major stratigraphic constraints, using the updated geomagnetic timescale (Gradstein *et al.*, 2020). For Site 603, the M16r–M16n, M16n–M15r, and M15r–M15n chron boundaries are combined with the NK2B–NK3A, NK3A–NK3B, NK3B–NC4A, and NC4B Zone boundaries to form a continuous, robust, timescale for the entire studied interval. The established ages of these stratigraphic horizons are used as anchor points for the studied record, with a constant deposition rate assumed for the sedimentary layers in between (Table S1).

| Stratigraphic interval | Base (mbsf) | Top (mbsf) | Thickness (m) | Start (Ma) | End (Ma) | Duration (kyr) | Time by strata (kyr/m) |
|------------------------|-------------|------------|---------------|------------|----------|----------------|------------------------|
| NC 4A                  | 1486.075    | 1445.885   | 40.19         | 132.00     | 130.09   | 1910           | 47.52                  |
| NK 3B                  | 1519.66     | 1486.075   | 33.585        | 134.01     | 132.00   | 2010           | 59.85                  |
| NK 3A                  | 1545.465    | 1519.66    | 25.805        | 136.85     | 134.01   | 2840           | 110.06                 |
| M15n (below NK3A)      | 1553.46     | 1545.465   | 7.995         | 138.02     | 136.85   | 1170           | 146.34                 |
| M15r                   | 1558.02     | 1553.46    | 5.16          | 138.48     | 138.02   | 462            | 89.53                  |
| M16n                   | 1572.055    | 1558.02    | 13.435        | 139.65     | 138.48   | 1167           | 86.86                  |

**Table S1: Determined ages, durations, and stratigraphic depths of anchor points used to construct the Berriasian–Valanginian timescale for Site 603.**

It has been hypothesized that uppermost Berriasian strata in cores 81–82 at Site 534 feature a hiatus (~1250 mbsf; Sheridan *et al.*, 1983a), based on seismic reflectance data. It should be noted that this hiatus has not been clearly detected in the recovered sedimentary material from cores 81–82, likely resulting from the incomplete recovery of core 81. However, the presence of a stratigraphic gap within those strata is consistent with the sharp shift to higher  $^{187}\text{Os}/^{188}\text{Os}_{(i)}$  values recorded between 1251.82 mbsf and 1247.86 mbsf at Site 534, with this jump not documented at Site 603.

The postulated position of the hiatus places it entirely within the NK2B Zone and M15 chron, hindering determination of the amount of unrecorded late Berriasian time at Site 534. However, whilst the position of the M15r–M15n boundary is not precisely constrained, previously published data suggest that it is no higher than 1253.42 mbsf (Ogg, 1987), in which case the hiatus falls within M15n. As the lowest strata that can be identified as part of M15n with some degree of confidence, 1253.42 mbsf is taken as an approximate position of the M15r–M15n boundary (age 138.02 Ma). The rate of sediment deposition is then calculated for M15r using this anchor point and the better defined M16n–M15r boundary at 1263.43 mbsf (138.482 Ma). Extrapolating this sedimentation rate into M15n gives an age of 137.95 Ma for the uppermost sample from below the hiatus (1251.82 mbsf). Determining a sedimentation rate for strata between the hiatus and the NK2B–NK3A boundary is more difficult. If the sedimentation rate calculated for strata immediately below the hiatus is also applied to those directly above it, the lowest sample from above the disconformity (1247.86 mbsf) can be dated to 137.36 Ma. However, if the sedimentation rate determined for NK3A is extrapolated down to the hiatus, 1247.86 mbsf has an age of 137.96 Ma. With no further information available, for each depth the mean age from these two age models is taken for strata between the hiatus and the NK2B–NK3A boundary.

The full set of anchor points and sedimentation rates used to construct the age model for Site 534 are shown in Table S2. However, the assumptions inherent in this age model, and the possible presence of other cryptic hiatuses in Berriasian strata at Site 534 (potentially hinted from the presence of graded sediment layers deposited by distal turbidites; Sheridan *et al.*, 1983b), mean that the determined ages for samples deposited below the NK3A Zone at that site should be treated with caution. The upper Berriasian hiatus has not been detected at Site 603, nor is any other disconformity visible, suggesting that the presented age model for that site is more robust.

| Stratigraphic interval | Base (mbsf) | Top (mbsf) | Thickness (m) | Start (Ma)                                                        | End (Ma) | Duration (kyr) | Time by strata (kyr/m) |
|------------------------|-------------|------------|---------------|-------------------------------------------------------------------|----------|----------------|------------------------|
| NC 4A                  | 1161.315    | 1123.68    | 37.635        | 132.00                                                            | 130.09   | 1910           | 50.75                  |
| NK 3B                  | 1208.415    | 1161.315   | 47.10         | 134.01                                                            | 132.00   | 2010           | 42.67                  |
| NK 3A                  | 1236.79     | 1208.415   | 28.375        | 136.85                                                            | 134.01   | 2840           | 100.09                 |
| NK 2B (above HIATUS)   | 1247.46     | 1236.79    | 10.67         | <i>Sedimentation rate assumed to be the same as NK 3A or M15r</i> |          |                |                        |
| M15r                   | 1263.43     | 1253.42?   | 10.01         | 138.48                                                            | 138.02   | 462            | 46.15                  |
| M16n                   | 1269.425    | 1263.43    | 5.995         | 139.65                                                            | 138.48   | 1167           | 194.66                 |
| M16r                   | 1276.59     | 1269.425   | 7.165         | 140.19                                                            | 139.65   | 537            | 74.95                  |
| M17n                   | 1283.665    | 1276.59    | 7.075         | 140.49                                                            | 140.19   | 306            | 43.25                  |

**Table S2: Determined ages, durations, and stratigraphic depths of anchor points used to construct the Berriasian–Valanginian timescale for Site 534.**

Despite the assumptions inherent in these timescales (particularly for Berriasian strata), when  $\delta^{13}\text{C}_{\text{carb}}$  and nutrient indicator taxa trends generated by Bornemann and Mutterlose (2008) are plotted against time using these age models, they show excellent comparability. Furthermore, the calculated ages of strata that record the base of the carbon isotope excursion (134.65 Ma and 134.74 Ma for Sites 603 and 534, respectively) are broadly consistent with the most recently determined date for the onset of the Weissert Event based on cyclostratigraphic durations of nannofossil zones (134.56 $\pm$ 0.19 Ma; Martinez *et al.*, 2023). Thus, the timescales used for these sites in this study appear to be reliable, especially for the Valanginian part of the record.

## S1-2: Analytical methodology

Seventeen samples from Site 603 and twenty-two from Site 534 were analyzed in this study. Most studied samples consisted of fine-grained laminated calcareous rocks with some organic matter present, plus five very carbonate-rich pale chalks from Site 534 also analyzed. Some strata that fall within or include turbiditic mudstones were also investigated, including the uppermost four samples from Site 603, and it cannot be discounted that other samples had been affected by similar sediment remobilization and transport. However, these thin turbidite layers still likely record a primary seawater osmium-isotope composition, as any remobilization and transport must have taken place on a small scale and over a brief geological time interval, shorter than the residence time of osmium in the ocean (10s kyr; see Peucker-Ehrenbrink and Ravizza, 2000). A previous study of turbiditic sediments across the Ordovician–Silurian boundary at Dobs Linn has highlighted their capacity to faithfully record seawater osmium-isotope trends (Finlay *et al.*, 2010). Indeed, for the Cenomanian–Turonian transition, the geologic time interval that has been most studied for osmium isotope trends across the highest number of globally distributed stratigraphic archives, the same overarching trends in  $^{187}\text{Os}/^{188}\text{Os}_{(i)}$  are generally documented. This consistency is irrespective of variability between different sites or within a single record in terms of either their sedimentary facies (e.g., organic-rich shales vs calcareous marls or nearshore vs distal pelagic sediments) or redox settings (spanning well oxygenated to euxinic) (see e.g., Du Vivier *et al.*, 2014, 2015; Jones *et al.*, 2021).

Geochemical preparation of the sedimentary rock samples from was performed at Durham University (UK), following digestion and purification procedures adapted from Selby and Creaser (2003) and Cumming *et al.* (2013). Briefly, Re and Os were leached from powdered bulk sedimentary rock samples via Carius-tube digestion with  $\text{Cr}^{\text{VI}}\text{O}_3\text{-H}_2\text{SO}_4$  over 48 hours at 220 °C. Following digestion, Os purification was achieved through solvent extraction by  $\text{CHCl}_3$  and microdistillation into  $\text{HBr}$ , whilst Re was purified using  $\text{NaOH}$  and acetone solvent extraction and anion chromatography. Concentrations and isotopic compositions of Re and Os were determined by isotope dilution and negative thermal ionisation mass spectrometry (N-TIMS) on a ThermoScientific Triton, with in-house standards used to monitor analytical reproducibility (see Nowell *et al.*, 2008; and supplementary information in Du Vivier *et al.*, 2014, and Sproson *et al.*, 2022). Procedural blanks were 11.3 $\pm$ 3.8 pg for Re and 0.096 $\pm$ 0.081 pg for Os, with a  $^{187}\text{Os}/^{188}\text{Os}$  ratio of 0.206 $\pm$ 0.017 (1 $\sigma$ ; n = 9). Analytical precision for the lab was monitored through repeated analysis of 50 pg DROsS and 125 pg ReSTD solution standards, which yielded a mean  $^{187}\text{Os}/^{188}\text{Os}$  ratio of 0.16087 $\pm$ 0.00014 (1 $\sigma$ ; n = 11) and  $^{187}\text{Re}/^{185}\text{Re}$  value of 0.59832 $\pm$ 0.00075 (1 $\sigma$ ; n = 7) over the course of the study, consistent with long-term running averages of 0.1608 $\pm$ 0.0006 (1 $\sigma$ ; n = 850) and 0.5986 $\pm$ 0.0015 (1 $\sigma$ ; n = 740), respectively.

As outlined in the main text, the past seawater Os isotope composition at the time of deposition ( $^{187}\text{Os}/^{188}\text{Os}_{(i)}$ ) was determined using the estimated age of the sample (see section above on age model construction) and the measured modern-day  $^{187}\text{Os}/^{188}\text{Os}$  and  $^{187}\text{Re}/^{188}\text{Os}$  ratios (Cohen *et al.*, 1999). To calculate the initial sedimentary concentration of osmium at the time of deposition prior to any production of post-depositional radiogenic  $^{187}\text{Os}$  (i.e., total Os minus radiogenic  $^{187}\text{Os}$ ), the  $^{187}\text{Os}/^{188}\text{Os}_{(i)}$  ratios were combined with Os molar abundances, assuming  $^{192}\text{Os}/^{188}\text{Os}$  of 3.08261 (c.f., Percival *et al.*, 2021).

### S1-3: Calculating the changes in Late Berriasian radiogenic vs unradiogenic osmium influx

A basic estimation of the maximum change in input of either radiogenic or unradiogenic osmium to the marine realm (assuming that the other was unchanged) can be made via a simple box model of the global ocean. The residence time of osmium in seawater on the order of 10s kyr allows for this simple approach, with the fractional increase in radiogenic osmium influx to the ocean calculated as follows (Dickson *et al.*, 2015; Percival *et al.*, 2016):

1.  $F_{\text{radiogenic}} = ({}^{187}\text{Os}/{}^{188}\text{Os}_{\text{seawater}} - {}^{187}\text{Os}/{}^{188}\text{Os}_{\text{unradiogenic}}) / ({}^{187}\text{Os}/{}^{188}\text{Os}_{\text{radiogenic}} - {}^{187}\text{Os}/{}^{188}\text{Os}_{\text{unradiogenic}})$
2.  $1 = F_{\text{radiogenic}} + F_{\text{unradiogenic}}$
3.  $\Delta F_{\text{radiogenic}} = ((F_{\text{unradiogenic}}(\text{pre-event}) / F_{\text{unradiogenic}}(\text{event})) - F_{\text{unradiogenic}}(\text{pre-event})) / F_{\text{radiogenic}}(\text{pre-event})$

Where  $F_{\text{radiogenic}}$  and  $F_{\text{unradiogenic}}$  represent the radiogenic and unradiogenic fractions of the osmium flux to seawater, respectively, and  ${}^{187}\text{Os}/{}^{188}\text{Os}_{\text{seawater}}$ ,  ${}^{187}\text{Os}/{}^{188}\text{Os}_{\text{radiogenic}}$ , and  ${}^{187}\text{Os}/{}^{188}\text{Os}_{\text{unradiogenic}}$  the average isotopic compositions of osmium in seawater (as determined analytically), radiogenic riverine runoff (1.4 today; Peucker-Ehrenbrink and Jahn, 2001) and unradiogenic mantle-derived sources (0.13; Allègre *et al.*, 1999).

#### Pre-Late Berriasian shift:

$$\begin{aligned} {}^{187}\text{Os}/{}^{188}\text{Os}_{\text{seawater}} &= 0.56 \\ \therefore \\ F_{\text{radiogenic}} &= (0.56 - 0.13) / (1.4 - 0.13) \\ 1 &= F_{\text{radiogenic}} + F_{\text{unradiogenic}} \\ \therefore \\ F_{\text{radiogenic}} &= 0.34, F_{\text{unradiogenic}} = 0.66 \end{aligned}$$

#### Post-Late Berriasian shift:

$$\begin{aligned} {}^{187}\text{Os}/{}^{188}\text{Os}_{\text{seawater}} &= 0.71 \\ \therefore \\ F_{\text{radiogenic}} &= (0.71 - 0.13) / (1.4 - 0.13) \\ 1 &= F_{\text{radiogenic}} + F_{\text{unradiogenic}} \\ \therefore \\ F_{\text{radiogenic}} &= 0.46, F_{\text{unradiogenic}} = 0.54 \\ \text{Thus, } \Delta F_{\text{radiogenic}} &= ((0.66/0.54) - 0.66) / 0.34 \\ \therefore \\ \Delta F_{\text{radiogenic}} &= 1.62 \end{aligned}$$

Assuming that the input of unradiogenic Os was unchanged, runoff of radiogenic Os **increased** by **~62%** during the Latest Berriasian.

Alternatively, if the flux of radiogenic osmium is assumed to have been constant, the change in input of unradiogenic osmium required to have caused the documented radiogenic shift in Os isotope compositions can be calculated as follows:

4.  $\Delta F_{\text{unradiogenic}} = F_{\text{radiogenic}}(\text{pre-event}) / ((F_{\text{unradiogenic}}(\text{pre-event}) / F_{\text{unradiogenic}}(\text{event})) - F_{\text{unradiogenic}}(\text{pre-event}))$

$$\begin{aligned}\text{Thus, } \Delta F_{\text{unradiogenic}} &= 0.34 / ((0.66/0.54) - 0.66) \\ &\therefore \\ \Delta F_{\text{unradiogenic}} &= 0.62\end{aligned}$$

Assuming that the runoff of radiogenic Os was unchanged, input of unradiogenic Os **decreased** by **~38%** during the Latest Berriasian.

#### S1-4: Calculating the changes in average Valanginian $^{187}\text{Os}/^{188}\text{Os}$ composition of riverine runoff

Following the Late Berriasian shift to a more radiogenic Os-isotope composition of seawater, it is assumed that global riverine runoff still had an average  $^{187}\text{Os}/^{188}\text{Os}$  composition of 1.4, as is the case today (Peucker-Ehrenbrink and Jahn, 2001). The eruption of Paraná-Etendeka basalts over an area of at least  $10^6 \text{ km}^2$  during the Valanginian would have significantly altered the make-up of the Earth's surface crust. Given the relatively unradiogenic composition of Paraná-Etendeka basalts ( $\sim 0.13$ ; Rocha-Júnior *et al.*, 2012), erosion of igneous rocks from that province in place of the continental crust that they had been extruded onto should have resulted in a change in the average  $^{187}\text{Os}/^{188}\text{Os}$  ratio of riverine runoff.

As outlined above, the fluxes of radiogenic osmium from riverine runoff ( $^{187}\text{Os}/^{188}\text{Os} = 1.4$ ) and unradiogenic Os from mid-ocean ridge activity, submarine basalt alteration, and cosmogenic material ( $^{187}\text{Os}/^{188}\text{Os} = 0.13$ ) were as follows after the Late Berriasian rise in weathering rates:

$$F_{\text{radiogenic}} = 0.46, F_{\text{unradiogenic}} = 0.54$$

At the point of maximum basalt weathering, the oceanic  $^{187}\text{Os}/^{188}\text{Os}$  ratio decreased to  $\sim 0.44$ . Assuming that the molar flux of osmium to the ocean from riverine runoff and unradiogenic sources did not change, the average riverine  $^{187}\text{Os}/^{188}\text{Os}$  composition can be calculated as follows:

$$\begin{aligned}1. \quad F_{\text{radiogenic}} &= (^{187}\text{Os}/^{188}\text{Os}_{\text{seawater}} - ^{187}\text{Os}/^{188}\text{Os}_{\text{unradiogenic}}) / (^{187}\text{Os}/^{188}\text{Os}_{\text{radiogenic}} - ^{187}\text{Os}/^{188}\text{Os}_{\text{unradiogenic}}) \\ &\quad ^{187}\text{Os}/^{188}\text{Os}_{\text{seawater}} = 0.44 \\ &\quad \therefore \\ 0.46 &= (0.44 - 0.13) / (^{187}\text{Os}/^{188}\text{Os}_{\text{radiogenic}} - 0.13) \\ \text{Thus, } ^{187}\text{Os}/^{188}\text{Os}_{\text{radiogenic}} &= ((0.44 - 0.13)/0.46) + 0.13 \\ &\quad \therefore \\ ^{187}\text{Os}/^{188}\text{Os}_{\text{radiogenic}} &= \mathbf{0.81}\end{aligned}$$

## Appendix S2-2: Age-depth model for DSDP Site 603 and DSDP Site 534

DSDP Site 603 B – Lower continental rise off Cape Hatteras

| Nannofossil Zone boundary | Depth (mbsf) | Age (Ma) | Magnetic Chron boundary | Notes |
|---------------------------|--------------|----------|-------------------------|-------|
| 4A–4B                     | 1445.885     | 130.09   |                         |       |
|                           | 1446         | 130.10   |                         |       |
|                           | 1447         | 130.14   |                         |       |
|                           | 1448         | 130.19   |                         |       |
|                           | 1449         | 130.24   |                         |       |
|                           | 1450         | 130.29   |                         |       |
|                           | 1451         | 130.33   |                         |       |
|                           | 1452         | 130.38   |                         |       |
|                           | 1453         | 130.43   |                         |       |
|                           | 1454         | 130.48   |                         |       |
|                           | 1455         | 130.52   |                         |       |
|                           | 1456         | 130.57   |                         |       |
|                           | 1457         | 130.62   |                         |       |
|                           | 1458         | 130.67   |                         |       |
|                           | 1459         | 130.71   |                         |       |
|                           | 1460         | 130.76   |                         |       |
|                           | 1461         | 130.81   |                         |       |
|                           | 1462         | 130.86   |                         |       |
|                           | 1463         | 130.90   |                         |       |
|                           | 1464         | 130.95   |                         |       |
|                           | 1465         | 131.00   |                         |       |
|                           | 1466         | 131.05   |                         |       |
|                           | 1467         | 131.09   |                         |       |
|                           | 1468         | 131.14   |                         |       |
|                           | 1469         | 131.19   |                         |       |
|                           | 1470         | 131.24   |                         |       |
|                           | 1471         | 131.28   |                         |       |
|                           | 1472         | 131.33   |                         |       |
|                           | 1473         | 131.38   |                         |       |
|                           | 1474         | 131.43   |                         |       |
|                           | 1475         | 131.47   |                         |       |
|                           | 1476         | 131.52   |                         |       |
|                           | 1477         | 131.57   |                         |       |
|                           | 1478         | 131.62   |                         |       |
|                           | 1479         | 131.66   |                         |       |
|                           | 1480         | 131.71   |                         |       |
|                           | 1481         | 131.76   |                         |       |
|                           | 1482         | 131.81   |                         |       |
|                           | 1483         | 131.85   |                         |       |
|                           | 1484         | 131.90   |                         |       |
|                           | 1485         | 131.95   |                         |       |
|                           | 1486         | 132.00   |                         |       |
| 3B–4A                     | 1486.075     | 132.00   |                         |       |
|                           | 1487         | 132.06   |                         |       |
|                           | 1488         | 132.12   |                         |       |
|                           | 1489         | 132.18   |                         |       |
|                           | 1490         | 132.23   |                         |       |
|                           | 1491         | 132.29   |                         |       |
|                           | 1492         | 132.35   |                         |       |
|                           | 1493         | 132.41   |                         |       |
|                           | 1494         | 132.47   |                         |       |
|                           | 1495         | 132.52   |                         |       |
|                           | 1496         | 132.58   |                         |       |
|                           | 1497         | 132.63   |                         |       |
|                           | 1498         | 132.71   |                         |       |
|                           | 1499         | 132.77   |                         |       |
|                           | 1500         | 132.83   |                         |       |
|                           | 1501         | 132.89   |                         |       |
|                           | 1502         | 132.95   |                         |       |
|                           | 1503         | 133.01   |                         |       |
|                           | 1504         | 133.07   |                         |       |
|                           | 1505         | 133.13   |                         |       |
|                           | 1506         | 133.19   |                         |       |
|                           | 1507         | 133.25   |                         |       |
|                           | 1508         | 133.31   |                         |       |
|                           | 1509         | 133.37   |                         |       |
|                           | 1510         | 133.43   |                         |       |
|                           | 1511         | 133.49   |                         |       |
|                           | 1512         | 133.55   |                         |       |
|                           | 1513         | 133.61   |                         |       |
|                           | 1514         | 133.67   |                         |       |
|                           | 1515         | 133.73   |                         |       |
|                           | 1516         | 133.79   |                         |       |
|                           | 1517         | 133.85   |                         |       |
|                           | 1518         | 133.91   |                         |       |
|                           | 1519         | 134.97   |                         |       |
| 3A–3B                     | 1519.466     | 134.01   |                         |       |
|                           | 1520         | 134.05   |                         |       |
|                           | 1521         | 134.16   |                         |       |
|                           | 1522         | 134.27   |                         |       |
|                           | 1523         | 134.38   |                         |       |
|                           | 1524         | 134.49   |                         |       |
|                           | 1525         | 134.60   |                         |       |
|                           | 1526         | 134.65   |                         |       |
|                           | 1527         | 134.71   |                         |       |
|                           | 1528         | 134.83   |                         |       |
|                           | 1529         | 135.04   |                         |       |
|                           | 1530         | 135.15   |                         |       |
| base CIE                  | 1531         | 135.26   |                         |       |
|                           | 1532         | 135.37   |                         |       |
|                           | 1533         | 135.48   |                         |       |
|                           | 1534         | 135.59   |                         |       |
|                           | 1535         | 135.70   |                         |       |
|                           | 1536         | 135.81   |                         |       |
|                           | 1537         | 135.92   |                         |       |
|                           | 1538         | 136.03   |                         |       |
|                           | 1539         | 136.14   |                         |       |
|                           | 1540         | 136.25   |                         |       |
|                           | 1541         | 136.36   |                         |       |
|                           | 1542         | 136.47   |                         |       |
|                           | 1543         | 136.58   |                         |       |
|                           | 1544         | 136.69   |                         |       |
|                           | 1545         | 136.80   |                         |       |
| 2B–3A                     | 1545.465     | 136.85   |                         |       |
|                           | 1546         | 136.93   |                         |       |
|                           | 1547         | 137.07   |                         |       |
|                           | 1548         | 137.22   |                         |       |
|                           | 1549         | 137.37   |                         |       |
|                           | 1550         | 137.51   |                         |       |
|                           | 1551         | 137.66   |                         |       |
|                           | 1552         | 137.81   |                         |       |
|                           | 1553         | 137.95   |                         |       |
|                           | 1553.46      | 138.020  | M15r–M15n               |       |
|                           | 1554         | 138.04   |                         |       |
|                           | 1555         | 138.16   |                         |       |
|                           | 1556         | 138.22   |                         |       |
|                           | 1557         | 138.34   |                         |       |
|                           | 1558         | 138.40   |                         |       |
|                           | 1558.62      | 138.482  | M16n–M15r               |       |
|                           | 1559         | 138.52   |                         |       |
|                           | 1560         | 138.60   |                         |       |
|                           | 1561         | 138.69   |                         |       |
|                           | 1562         | 138.78   |                         |       |
|                           | 1563         | 138.86   |                         |       |
|                           | 1564         | 138.95   |                         |       |
|                           | 1565         | 139.04   |                         |       |
|                           | 1566         | 139.12   |                         |       |
|                           | 1567         | 139.21   |                         |       |
|                           | 1568         | 139.30   |                         |       |
|                           | 1569         | 139.38   |                         |       |
|                           | 1570         | 139.47   |                         |       |
|                           | 1571         | 139.56   |                         |       |
|                           | 1572.055     | 139.649  | M16n–M16n               |       |

DSDP Site 534 A – Blake Bahama Basin

| Nannofossil Zone boundary | Depth (mbsf) | Age (Ma) | Magnetic chron boundary | Notes                                         |                          |
|---------------------------|--------------|----------|-------------------------|-----------------------------------------------|--------------------------|
| 4A–4B                     | 1123.68      | 130.09   |                         |                                               |                          |
|                           | 1124         | 130.11   |                         |                                               |                          |
|                           | 1125         | 130.16   |                         |                                               |                          |
|                           | 1126         | 130.21   |                         |                                               |                          |
|                           | 1127         | 130.26   |                         |                                               |                          |
|                           | 1128         | 130.31   |                         |                                               |                          |
|                           | 1129         | 130.36   |                         |                                               |                          |
|                           | 1130         | 130.41   |                         |                                               |                          |
|                           | 1131         | 130.46   |                         |                                               |                          |
|                           | 1132         | 130.51   |                         |                                               |                          |
|                           | 1133         | 130.56   |                         |                                               |                          |
|                           | 1134         | 130.61   |                         |                                               |                          |
|                           | 1135         | 130.66   |                         |                                               |                          |
|                           | 1136         | 130.72   |                         |                                               |                          |
|                           | 1137         | 130.77   |                         |                                               |                          |
|                           | 1138         | 130.82   |                         |                                               |                          |
|                           | 1139         | 130.87   |                         |                                               |                          |
|                           | 1140         | 130.92   |                         |                                               |                          |
|                           | 1141         | 130.97   |                         |                                               |                          |
|                           | 1142         | 131.02   |                         |                                               |                          |
|                           | 1143         | 131.07   |                         |                                               |                          |
|                           | 1144         | 131.12   |                         |                                               |                          |
|                           | 1145         | 131.17   |                         |                                               |                          |
|                           | 1146         | 131.22   |                         |                                               |                          |
|                           | 1147         | 131.27   |                         |                                               |                          |
|                           | 1148         | 131.32   |                         |                                               |                          |
|                           | 1149         | 131.38   |                         |                                               |                          |
|                           | 1150         | 131.43   |                         |                                               |                          |
|                           | 1151         | 131.48   |                         |                                               |                          |
|                           | 1152         | 131.53   |                         |                                               |                          |
|                           | 1153         | 131.58   |                         |                                               |                          |
|                           | 1154         | 131.63   |                         |                                               |                          |
|                           | 1155         | 131.68   |                         |                                               |                          |
|                           | 1156         | 131.73   |                         |                                               |                          |
|                           | 1157         | 131.78   |                         |                                               |                          |
|                           | 1158         | 131.83   |                         |                                               |                          |
|                           | 1159         | 131.88   |                         |                                               |                          |
|                           | 1160         | 131.93   |                         |                                               |                          |
| 3B–4A                     | 1161         | 131.98   |                         |                                               |                          |
|                           | 1161.315     | 132      |                         |                                               |                          |
|                           | 1162         | 132.03   |                         |                                               |                          |
|                           | 1163         | 132.07   |                         |                                               |                          |
|                           | 1164         | 132.11   |                         |                                               |                          |
|                           | 1165         | 132.16   |                         |                                               |                          |
|                           | 1166         | 132.20   |                         |                                               |                          |
|                           | 1167         | 132.24   |                         |                                               |                          |
|                           | 1168         | 132.29   |                         |                                               |                          |
|                           | 1169         | 132.33   |                         |                                               |                          |
|                           | 1170         | 132.37   |                         |                                               |                          |
|                           | 1171         | 132.41   |                         |                                               |                          |
|                           | 1172         | 132.46   |                         |                                               |                          |
|                           | 1173         | 132.50   |                         |                                               |                          |
|                           | 1174         | 132.54   |                         |                                               |                          |
|                           | 1175         | 132.58   |                         |                                               |                          |
|                           | 1176         | 132.63   |                         |                                               |                          |
|                           | 1177         | 132.67   |                         |                                               |                          |
|                           | 1178         | 132.71   |                         |                                               |                          |
|                           | 1179         | 132.75   |                         |                                               |                          |
|                           | 1180         | 132.80   |                         |                                               |                          |
|                           | 1181         | 132.84   |                         |                                               |                          |
|                           | 1182         | 132.88   |                         |                                               |                          |
|                           | 1183         | 132.93   |                         |                                               |                          |
|                           | 1184         | 132.97   |                         |                                               |                          |
|                           | 1185         | 133.01   |                         |                                               |                          |
|                           | 1186         | 133.05   |                         |                                               |                          |
|                           | 1187         | 133.10   |                         |                                               |                          |
|                           | 1188         | 133.14   |                         |                                               |                          |
|                           | 1189         | 133.18   |                         |                                               |                          |
|                           | 1190         | 133.22   |                         |                                               |                          |
|                           | 1191         | 133.27   |                         |                                               |                          |
|                           | 1192         | 133.31   |                         |                                               |                          |
|                           | 1193         | 133.35   |                         |                                               |                          |
|                           | 1194         | 133.39   |                         |                                               |                          |
|                           | 1195         | 133.44   |                         |                                               |                          |
|                           | 1196         | 133.48   |                         |                                               |                          |
|                           | 1197         | 133.52   |                         |                                               |                          |
|                           | 1198         | 133.57   |                         |                                               |                          |
|                           | 1199         | 133.61   |                         |                                               |                          |
|                           | 1200         | 133.65   |                         |                                               |                          |
|                           | 1201         | 133.69   |                         |                                               |                          |
|                           | 1202         | 133.74   |                         |                                               |                          |
|                           | 1203         | 133.78   |                         |                                               |                          |
|                           | 1204         | 133.82   |                         |                                               |                          |
| 1205                      | 133.86       |          |                         |                                               |                          |
| 1206                      | 133.91       |          |                         |                                               |                          |
| 1207                      | 133.95       |          |                         |                                               |                          |
| 1208                      | 133.99       |          |                         |                                               |                          |
| 3A–3B                     | 1208.415     | 134.01   |                         |                                               |                          |
|                           | 1209         | 134.07   |                         |                                               |                          |
|                           | 1210         | 134.17   |                         |                                               |                          |
|                           | 1211         | 134.27   |                         |                                               |                          |
|                           | 1212         | 134.37   |                         |                                               |                          |
|                           | 1213         | 134.47   |                         |                                               |                          |
|                           | 1214         | 134.57   |                         |                                               |                          |
|                           | 1215         | 134.67   |                         |                                               |                          |
|                           | 1215.69      | 134.74   |                         | base CIE (134.56±0.19; Martinez et al., 2023) |                          |
|                           | 1216         | 134.77   |                         |                                               |                          |
|                           | 1217         | 134.87   |                         |                                               |                          |
|                           | 1218         | 134.97   |                         |                                               |                          |
|                           | 1219         | 135.07   |                         |                                               |                          |
|                           | 1220         | 135.17   |                         |                                               |                          |
|                           | 1221         | 135.27   |                         |                                               |                          |
|                           | 1222         | 135.37   |                         |                                               |                          |
|                           | 1223         | 135.47   |                         |                                               |                          |
|                           | 1224         | 135.57   |                         |                                               |                          |
|                           | 1225         | 135.67   |                         |                                               |                          |
|                           | 1226         | 135.77   |                         |                                               |                          |
|                           | 1227         | 135.87   |                         |                                               |                          |
|                           | 1228         | 135.97   |                         |                                               |                          |
|                           | 1229         | 136.07   |                         |                                               |                          |
|                           | 1230         | 136.17   |                         |                                               |                          |
|                           | 1231         | 136.27   |                         |                                               |                          |
|                           | 1232         | 136.37   |                         |                                               |                          |
|                           | 1233         | 136.47   |                         |                                               |                          |
|                           | 1234         | 136.57   |                         |                                               |                          |
|                           | 1235         | 136.67   |                         |                                               |                          |
|                           | 1236         | 136.77   |                         |                                               |                          |
|                           | 2B–3A        | 1236.79  | 136.83                  |                                               |                          |
|                           |              | 1237     | 136.87                  |                                               |                          |
|                           |              | 1238     | 136.94                  |                                               | between 136.86–136.97 Ma |
|                           |              | 1239     | 137.01                  |                                               | between 136.91–137.07 Ma |
| 1240                      |              | 137.08   |                         | between 137.00–137.17 Ma                      |                          |
| 1241                      |              | 137.16   |                         | between 137.04–137.27 Ma                      |                          |
| 1242                      |              | 137.23   |                         | between 137.09–137.37 Ma                      |                          |
| 1243                      |              | 137.30   |                         | between 137.14–137.47 Ma                      |                          |
| 1244                      |              | 137.38   |                         | between 137.18–137.57 Ma                      |                          |
| 1245                      |              | 137.45   |                         | between 137.23–137.67 Ma                      |                          |
| 1246                      |              | 137.52   |                         | between 137.28–137.77 Ma                      |                          |
| 1247                      |              | 137.60   |                         | between 137.32–137.87 Ma                      |                          |
| 1247.86                   |              | 137.66   |                         | between 137.36–137.96 Ma                      |                          |
|                           |              |          |                         |                                               |                          |
|                           |              |          |                         |                                               |                          |
|                           |              |          |                         |                                               |                          |
|                           |              |          |                         |                                               |                          |
|                           |              |          |                         |                                               |                          |
|                           |              |          |                         |                                               |                          |
|                           |              |          |                         |                                               |                          |
|                           |              |          |                         |                                               |                          |
|                           |              |          |                         |                                               |                          |
|                           |              |          |                         |                                               |                          |
|                           |              |          |                         |                                               |                          |
|                           |              |          |                         |                                               |                          |
|                           |              |          |                         |                                               |                          |
|                           |              |          |                         |                                               |                          |
|                           |              |          |                         |                                               |                          |
|                           |              |          |                         |                                               |                          |
|                           |              |          |                         |                                               |                          |
|                           |              |          |                         |                                               |                          |
|                           |              |          |                         |                                               |                          |
|                           |              |          |                         |                                               |                          |
|                           |              |          |                         |                                               |                          |
|                           |              |          |                         |                                               |                          |
|                           |              |          |                         |                                               |                          |
|                           |              |          |                         |                                               |                          |
|                           |              |          |                         |                                               |                          |
|                           |              |          |                         |                                               |                          |
|                           |              |          |                         |                                               |                          |
|                           |              |          |                         |                                               |                          |
|                           |              |          |                         |                                               |                          |
|                           |              |          |                         |                                               |                          |
|                           |              |          |                         |                                               |                          |
|                           |              |          |                         |                                               |                          |
|                           |              |          |                         |                                               |                          |
|                           |              |          |                         |                                               |                          |
|                           |              |          |                         |                                               |                          |
|                           |              |          |                         |                                               |                          |
|                           |              |          |                         |                                               |                          |
|                           |              |          |                         |                                               |                          |
|                           |              |          |                         |                                               |                          |
|                           |              |          |                         |                                               |                          |
|                           |              |          |                         |                                               |                          |
|                           |              |          |                         |                                               |                          |
|                           |              |          |                         |                                               |                          |
|                           |              |          |                         |                                               |                          |
|                           |              |          |                         |                                               |                          |
|                           |              |          |                         |                                               |                          |
|                           |              |          |                         |                                               |                          |
|                           |              |          |                         |                                               |                          |
|                           |              |          |                         |                                               |                          |
|                           |              |          |                         |                                               |                          |
|                           |              |          |                         |                                               |                          |
|                           |              |          |                         |                                               |                          |
|                           |              |          |                         |                                               |                          |
|                           |              |          |                         |                                               |                          |
|                           |              |          |                         |                                               |                          |
|                           |              |          |                         |                                               |                          |
|                           |              |          |                         |                                               |                          |
|                           |              |          |                         |                                               |                          |
|                           |              |          |                         |                                               |                          |
|                           |              |          |                         |                                               |                          |
|                           |              |          |                         |                                               |                          |
|                           |              |          |                         |                                               |                          |
|                           |              |          |                         |                                               |                          |
|                           |              |          |                         |                                               |                          |
|                           |              |          |                         |                                               |                          |
|                           |              |          |                         |                                               |                          |
|                           |              |          |                         |                                               |                          |
|                           |              |          |                         |                                               |                          |
|                           |              |          |                         |                                               |                          |
|                           |              |          |                         |                                               |                          |
|                           |              |          |                         |                                               |                          |
|                           |              |          |                         |                                               |                          |
|                           |              |          |                         |                                               |                          |
|                           |              |          |                         |                                               |                          |
|                           |              |          |                         |                                               |                          |
|                           |              |          |                         |                                               |                          |
|                           |              |          |                         |                                               |                          |
|                           |              |          |                         |                                               |                          |
|                           |              |          |                         |                                               |                          |
|                           |              |          |                         |                                               |                          |
|                           |              |          |                         |                                               |                          |
|                           |              |          |                         |                                               |                          |
|                           |              |          |                         |                                               |                          |
|                           |              |          |                         |                                               |                          |
|                           |              |          |                         |                                               |                          |
|                           |              |          |                         |                                               |                          |
|                           |              |          |                         |                                               |                          |
|                           |              |          |                         |                                               |                          |
|                           |              |          |                         |                                               |                          |
|                           |              |          |                         |                                               |                          |
|                           |              |          |                         |                                               |                          |
|                           |              |          |                         |                                               |                          |
|                           |              |          |                         |                                               |                          |
|                           |              |          |                         |                                               |                          |
|                           |              |          |                         |                                               |                          |
|                           |              |          |                         |                                               |                          |
|                           |              |          |                         |                                               |                          |
|                           |              |          |                         |                                               |                          |
|                           |              |          |                         |                                               |                          |
|                           |              |          |                         |                                               |                          |
|                           |              |          |                         |                                               |                          |
|                           |              |          |                         |                                               |                          |
|                           |              |          |                         |                                               |                          |
|                           |              |          |                         |                                               |                          |
|                           |              |          |                         |                                               |                          |
|                           |              |          |                         |                                               |                          |
|                           |              |          |                         |                                               |                          |
|                           |              |          |                         |                                               |                          |
|                           |              |          |                         |                                               |                          |
|                           |              |          |                         |                                               |                          |
|                           |              |          |                         |                                               |                          |

## References:

- Aguirre-Urreta, M.B., Pazos, P.J., Lazo, D.G., Fanning, C.M. and Litvak, V.D., 2008, First U–Pb SHRIMP age of the Hauterivian stage, Neuquén Basin, Argentina: *Journal of South American Earth Sciences*, v. 26, p. 91–99, <https://doi.org/10.1016/j.jsames.2008.01.001>.
- Aguirre-Urreta, B., Lescano, M., Schmitz, M.D., Tunik, M., Concheyro, A., Rawson, P.F. and Ramos, V.A., 2015, Filling the gap: new precise Early Cretaceous radioisotopic ages from the Andes: *Geological Magazine*, v. 152, p. 557–564, <https://doi.org/10.1017/S001675681400082X>.
- Aguirre-Urreta, B., Schmitz, M., Lescano, M., Tunik, M., Rawson, P.F., Concheyro, A., Buhler, M. and Ramos, V.A., 2017, A high precision U–Pb radioisotopic age for the Agrio Formation, Neuquén Basin, Argentina: Implications for the chronology of the Hauterivian Stage. *Cretaceous Research*, 75, p. 193–204, <https://doi.org/10.1016/j.cretres.2017.03.027>.
- Allègre, C.J., Birck, J.L., Capmas, F. and Courtillot, V., 1999, Age of the Deccan traps using  $^{187}\text{Re}$ – $^{187}\text{Os}$  systematics: *Earth and Planetary Science Letters*, v. 170, p. 197–204, [https://doi.org/10.1016/S0012-821X\(99\)00110-7](https://doi.org/10.1016/S0012-821X(99)00110-7).
- Bergen, J.A., 1994, Berriasian to early Aptian calcareous nannofossils from the Vocontian Trough (SE France) and Deep Sea Drilling Site 534: new nannofossil taxa and a summary of low-latitude biostratigraphic events: *Journal of Nannoplankton Research*, v. 16, p. 59–69.
- Bornemann, A. and Mutterlose, J., 2008, Calcareous nannofossil and  $\delta^{13}\text{C}$  records from the Early Cretaceous of the Western Atlantic Ocean: evidence for enhanced fertilization across the Berriasian–Valanginian transition: *Palaaios*, v. 23, p. 821–832, <https://doi.org/10.2110/palo.2007.p07-076r>.
- Charbonnier, G., Boulila, S., Gardin, S., Duchamp-Alphonse, S., Adatte, T., Spangenberg, J.E., Föllmi, K.B., Colin, C. and Galbrun, B., 2013, Astronomical calibration of the Valanginian “Weissert” episode: the Orpierre marl–limestone succession (Vocontian Basin, southeastern France): *Cretaceous Research*, v. 45, p. 25–42, <https://doi.org/10.1016/j.cretres.2013.07.003>.
- Cohen, A.S., Coe, A.L., Bartlett, J.M. and Hawkesworth, C.J., 1999, Precise Re–Os ages of organic-rich mudrocks and the Os isotope composition of Jurassic seawater: *Earth and Planetary Science Letters*, v. 167, p. 159–173, [https://doi.org/10.1016/S0012-821\(99\)00026-6](https://doi.org/10.1016/S0012-821(99)00026-6).
- Covington, J.M. and Wise, S.W., 1987, Calcareous nannofossil biostratigraphy of a lower Cretaceous deep-sea fan complex: Deep Sea Drilling Project Leg 93 Site 603, lower continental rise off Cape Hatteras, USA, *in* van Hinte, J.E., Wise, S.W. Jr. et al., Initial Reports of the Deep Sea Drilling Project, Volume 93: Washington, D.C., U.S. Government Printing Office, p. 617–660.
- Cumming, V.M., Poulton, S.W., Rooney, A.D. and Selby, D., 2013, Anoxia in the terrestrial environment during the late Mesoproterozoic: *Geology*, v. 41, p. 583–586, <https://doi.org/10.1130/G34299.1>.
- Dickson, A.J., Cohen, A.S., Coe, A.L., Davies, M., Shcherbinina, E.A. and Gavrillov, Y.O., 2015, Evidence for weathering and volcanism during the PETM from Arctic and Peri-Tethys osmium isotope records: *Palaeogeography, Palaeoclimatology, Palaeoecology*, v. 438, p. 300–307, <https://doi.org/10.1016/j.palaeo.2015.08.019>.
- Du Vivier, A.D., Selby, D., Sageman, B.B., Jarvis, I., Gröcke, D.R. and Voigt, S., 2014, Marine  $^{187}\text{Os}/^{188}\text{Os}$  isotope stratigraphy reveals the interaction of volcanism and ocean circulation during Oceanic Anoxic Event 2: *Earth and Planetary Science Letters*, v. 389, p. 23–33, <https://doi.org/10.1016/j.epsl.2013.12.024>.
- Du Vivier, A.D.C., Selby, D., Condon, D.J., Takashima, R. and Nishi, H., 2015, Pacific  $^{187}\text{Os}/^{188}\text{Os}$  isotope chemistry and U–Pb geochronology: Synchronicity of global Os isotope change across OAE 2: *Earth and Planetary Science Letters*, v. 428, p. 204–216, <https://doi.org/10.1016/j.epsl.2015.07.020>.
- Finlay, A.J., Selby, D. and Gröcke, D.R., 2010, Tracking the Hirnantian glaciation using Os isotopes. *Earth and Planetary Science Letters*, 293, p. 339–348, <https://doi.org/10.1016/j.epsl.2010.02.049>.
- Gradstein, F.M., Ogg, J.G. and Smith, A., 2004, *A Geological Time Scale 2004*: Cambridge, UK, Cambridge University Press.



- Gradstein, F.M., Ogg, J.G., Schmitz, M.D. and Ogg, G.M., 2020, *Geological Time Scale 2020*: Amsterdam, Netherlands, Elsevier.
- Jones, M.M., Sageman, B.B., Selby, D., Jicha, B.R., Singer, B.S. and Titus, A.L., 2021, Regional chronostratigraphic synthesis of the Cenomanian-Turonian oceanic anoxic event 2 (OAE2) interval, Western Interior Basin (USA): New Re-Os chemostratigraphy and  $^{40}\text{Ar}/^{39}\text{Ar}$  geochronology: *GSA Bulletin*, v. 133, p. 1090–1104, <https://doi.org/10.1130/B35594.1>.
- Littler, K., Robinson, S.A., Bown, P.R., Nederbragt, A.J. and Pancost, R.D., 2011, High sea-surface temperatures during the Early Cretaceous Epoch: *Nature Geoscience*, v. 4, p. 169–172, <https://doi.org/10.1038/ngeo1081>.
- Martinez, M., Deconinck, J.F., Pellenard, P., Reboulet, S. and Riquier, L., 2013, Astrochronology of the Valanginian Stage from reference sections (Vocontian Basin, France) and palaeoenvironmental implications for the Weissert Event: *Palaeogeography, Palaeoclimatology, Palaeoecology*, v. 376, p. 91–102, <https://doi.org/10.1016/j.palaeo.2013.02.021>.
- Martinez, M., Deconinck, J.F., Pellenard, P., Riquier, L., Company, M., Reboulet, S. and Moiroud, M., 2015, Astrochronology of the Valanginian–Hauterivian stages (Early Cretaceous): Chronological relationships between the Paraná–Etendeka large igneous province and the Weissert and the Faraoni events: *Global and Planetary Change*, v. 131, p. 158–173, <https://doi.org/10.1016/j.gloplacha.2015.06.001>.
- Martinez, M., Aguirre-Urreta, B., Dera, G., Lescano, M., Omarini, J., Tunik, M., O'Dogherty, L., Aguado, R., Company, M. and Bodin, S., 2023, Synchrony of carbon cycle fluctuations, volcanism and orbital forcing during the Early Cretaceous. *Earth-Science Reviews*, 104356, <https://doi.org/10.1016/j.earscirev.2023.104356>.
- Nowell, G.M., Luguet, A., Pearson, D.G. and Horstwood, M.S.A., 2008, Precise and accurate  $^{186}\text{Os}/^{188}\text{Os}$  and  $^{187}\text{Os}/^{188}\text{Os}$  measurements by multi-collector plasma ionisation mass spectrometry (MC-ICP-MS) part I: Solution analyses: *Chemical Geology*, v. 248, p. 363–393, <https://doi.org/10.1016/j.chemgeo.2007.10.020>.
- Ogg, J.G., 1987, Early Cretaceous magnetic polarity time scale and the magnetostratigraphy of Deep Sea Drilling Project sites 603 and 534, western central Atlantic, *in* van Hinte, J.E., Wise, S.W. Jr. et al., *Initial Reports of the Deep Sea Drilling Project, Volume 93*: Washington, D.C., U.S. Government Printing Office, p.849–879.
- Percival, L.M.E., Cohen, A.S., Davies, M.K., Dickson, A.J., Hesselbo, S.P., Jenkyns, H.C., Leng, M.J., Mather, T.A., Storm, M.S. and Xu, W., 2016, Osmium isotope evidence for two pulses of increased continental weathering linked to Early Jurassic volcanism and climate change: *Geology*, v. 44, p. 759–762, <https://doi.org/10.1130/G37997.1>.
- Percival, L.M.E., Tedeschi, L.R., Creaser, R.A., Bottini, C., Erba, E., Giraud, F., Svensen, H., Savian, J., Trindade, R., Coccioni, R. and Frontalini, F., 2021b, Determining the style and provenance of magmatic activity during the Early Aptian Oceanic Anoxic Event (OAE 1a): *Global and Planetary Change*, v. 200, 103461, <https://doi.org/10.1016/j.gloplacha.2021.103461>.
- Peucker-Ehrenbrink, B. and Jahn, B.M., 2001, Rhenium-osmium isotope systematics and platinum group element concentrations: Loess and the upper continental crust: *Geochemistry, Geophysics, Geosystems*, v. 2, 2001GC000172, <https://doi.org/10.1029/2001GC000172>.
- Rocha-Júnior, E.R., Puchtel, I.S., Marques, L.S., Walker, R.J., Machado, F.B., Nardy, A.J., Babinski, M. and Figueiredo, A.M., 2012, Re–Os isotope and highly siderophile element systematics of the Paraná continental flood basalts (Brazil): *Earth and Planetary Science Letters*, v. 337, p. 164–173, <https://doi.org/10.1016/j.epsl.2012.04.050>.
- Selby, D. and Creaser, R.A., 2003, Re–Os geochronology of organic rich sediments: an evaluation of organic matter analysis methods: *Chemical Geology*, v. 200, p. 225–240, [https://doi.org/10.1016/S0009-2541\(03\)00199-2](https://doi.org/10.1016/S0009-2541(03)00199-2).
- Sheridan, R.E., Bates, L.G., Shipley, T.H. and Crosby, J.T., 1983a, Seismic stratigraphy in the Blake-Bahama Basin and the Origin of Horizon D, *in* Sheridan, R.E., Gradstein, F.M. et al., *Initial Reports of the Deep Sea Drilling Project, Volume 76*: Washington, D.C., U.S. Government Printing Office, p. 667–683.

- Sheridan, R.E. *et al.*, 1983b, Site 534: Blake-Bahama Basin, *in* Sheridan, R.E., Gradstein, F.M. *et al.*, Initial Reports of the Deep Sea Drilling Project, Volume 76: Washington, D.C., U.S. Government Printing Office, p. 141–340.
- Smoliar, M.I., Walker, R.J. and Morgan, J.W., 1996, Re-Os ages of group IIA, IIIA, IVA, and IVB iron meteorites: *Science*, v. 271, p. 1099–1102, <https://doi.org/10.1126/science.271.5252.1099>.
- Sproson, A.D., Pogge von Strandmann, P.A.E., Selby, D., Jarochovska, E., Frýda, J., Hladil, J., Loydell, D.K., Slavík, L., Calner, M., Maier, G., Munnecke, A. and Lenton, T.M., 2022, Osmium and lithium isotope evidence for weathering feedbacks linked to orbitally paced organic carbon burial and Silurian glaciations: *Earth and Planetary Science Letters*, v. 577, 117260, <https://doi.org/10.1016/j.epsl.2021.117260>.
- van Hinte, J.E. *et al.*, 1987, Site 603, *in* van Hinte, J.E., Wise, S.W. Jr. *et al.*, Initial Reports of the Deep Sea Drilling Project, Volume 93: Washington, D.C., U.S. Government Printing Office, p. 25–276.
